# Supplementary material for: Fabrication of Cd(OH)2 nanorings by ultrasonic chiselling on Cd(OH)2 nanoplates
Source: Royal Society of Chemistry journal article supplement (doi:10.1039/b604688f), 2006-01-01
Supplement: b604688f.pdf [file b604688f.pdf]

## Supplementary Information

### Fabrication of $\text{Cd}(\text{OH})_2$ nanorings by ultrasonic chiseling on $\text{Cd}(\text{OH})_2$ nanoplates

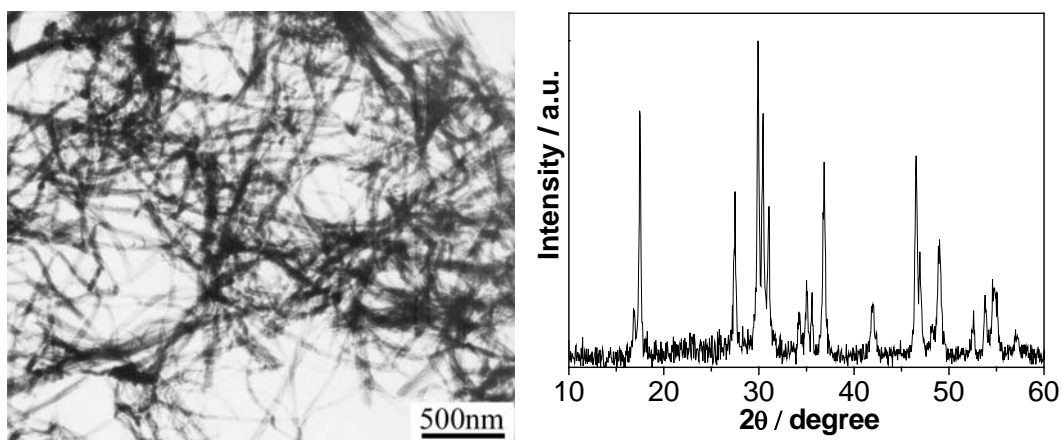

**Fig. S1** TEM image and XRD pattern of the  $\text{Cd}(\text{OH})_2$  nanowire byproduct

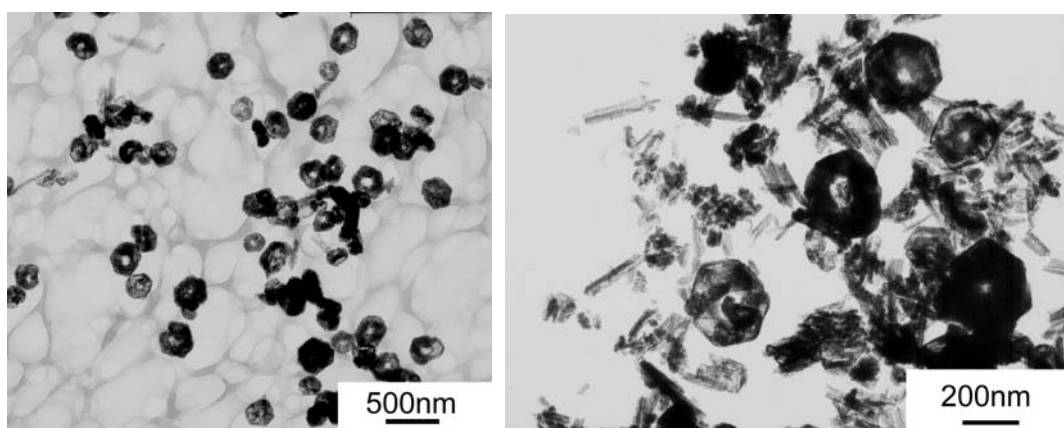

**Fig. S2** CdS (left) and CdSe(right) rings synthesized by using the  $\text{Cd}(\text{OH})_2$  nanorings as template

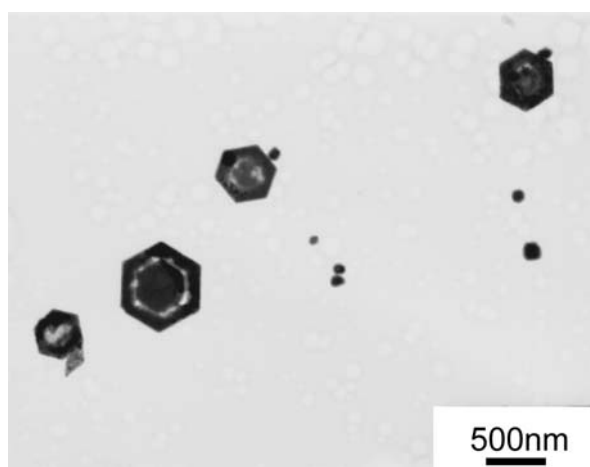

**Fig. S3** TEM image of  $\text{PbF}_2$  nanoplates with hole in the center synthesized by ultrasonic irradiation
